# Supplementary material for: Reversibility of Antipsychotic-Induced Weight Gain: A Systematic Review and Meta-Analysis
Source: PubMed Central journal article supplement (PMC8355990; doi:10.3389/fendo.2021.577919), 2021-07-28
Supplement: DataSheet_1.pdf [file DataSheet_1.pdf]

| <u>Study ID</u>   | <u>D1</u> | <u>D3</u> | <u>Overall</u> |    |                       |
|-------------------|-----------|-----------|----------------|----|-----------------------|
| Alexopoulos 2008  |           |           |                |    | Low risk              |
| Beasley 2003      |           |           |                |    | Some concerns         |
| Berwaerts 2012    |           |           |                |    | High risk             |
| Brunner 2014      |           |           |                |    |                       |
| Calabrese 2017    |           |           |                | D1 | Randomisation process |
| Chen 2010         |           |           |                |    |                       |
| Cooper 2000       |           |           |                | D3 | Missing outcome data  |
| Durgam 2020       |           |           |                |    |                       |
| Fleischacker 2017 |           |           |                |    |                       |
| Flint 2019        |           |           |                |    |                       |
| Fu 2015           |           |           |                |    |                       |
| Kane 2010         |           |           |                |    |                       |
| Kane 2011         |           |           |                |    |                       |
| Kane 2012         |           |           |                |    |                       |
| Keck 2007         |           |           |                |    |                       |
| Kramer 2007       |           |           |                |    |                       |
| Liebowitz 2010    |           |           |                |    |                       |
| Macfadden 2009    |           |           |                |    |                       |
| Marcus 2011       |           |           |                |    |                       |
| Newcomer 2008     |           |           |                |    |                       |
| Ozawa 2019        |           |           |                |    |                       |
| Peuskens 2007     |           |           |                |    |                       |
| Pigott 2003       |           |           |                |    |                       |
| Quiroz 2010       |           |           |                |    |                       |
| Rouillon 2008     |           |           |                |    |                       |
| Rui 2014          |           |           |                |    |                       |
| Stroup 2013       |           |           |                |    |                       |
| Suppes 2009       |           |           |                |    |                       |
| Takeuchi 2014     |           |           |                |    |                       |
| Tohen 2004        |           |           |                |    |                       |
| Tohen 2006        |           |           |                |    |                       |
| Tsuboi 2015       |           |           |                |    |                       |
| Wang 2010         |           |           |                |    |                       |
| Weiden 2019       |           |           |                |    |                       |
| Weisler 2011      |           |           |                |    |                       |
| Weiss 2016        |           |           |                |    |                       |
| Yatham 2013       |           |           |                |    |                       |
| Carlson 2012      |           |           |                |    |                       |
| Young 2014        |           |           |                |    |                       |
| Rapaport 2006     |           |           |                |    |                       |
