# Supplementary material for: Reversibility of Antipsychotic-Induced Weight Gain: A Systematic Review and Meta-Analysis
Source: PubMed Central journal article supplement (PMC8355990; doi:10.3389/fendo.2021.577919), 2021-07-28

Funnel Plot of Standard Error by Difference in means

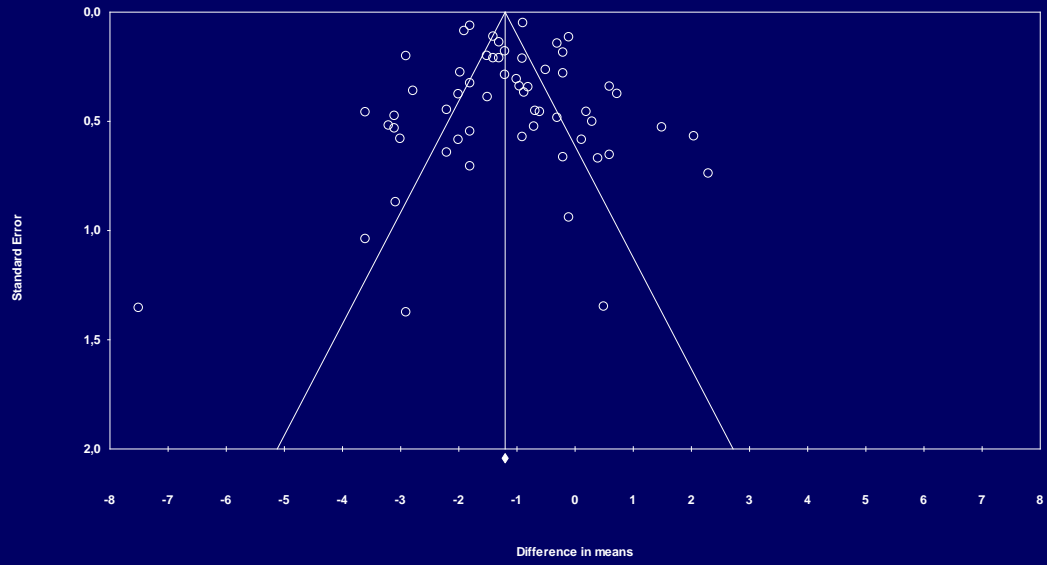

Supplement: DataSheet_2.pdf [file DataSheet_2.pdf]
